# Supplementary material for: Alteration of pancreatic carcinoma and promyeloblastic cell adhesion in liver microvasculature by co-culture of hepatocytes, hepatic stellate cells and endothelial cells in a physiologically-relevant model
Source: Royal Society of Chemistry journal article supplement (doi:10.1039/c6ib00237d), 2017-03-21
Supplement: c6ib00237d1.pdf [file c6ib00237d1.pdf]

**Figure S1.** Immunodetection of (A–D) LYVE-1 (red) and (E–H) DAPI (blue) on day 6 by confocal microscopy.

**Figure S2.** Higher magnification images of (A, B) ICAM-1 (magenta) immunoreactivity and (C, D) DAPI staining (blue), and of (E, F) VAP-1 immunoreactivity (green) and (G, H) DAPI staining (blue) on day 6 detected by confocal imaging.

**Figure S3.** Higher magnification images of (A, B) Stabilin-1 immunoreactivity (magenta) and (C, D) DAPI staining (blue) on day 6 detected by confocal imaging.

**Figure S4.** Higher magnification images of (A, B) ICAM-1 immunoreactivity (magenta) and (C, D) DAPI staining (blue) on day 6 detected by confocal imaging after TNF- $\alpha$  stimulation

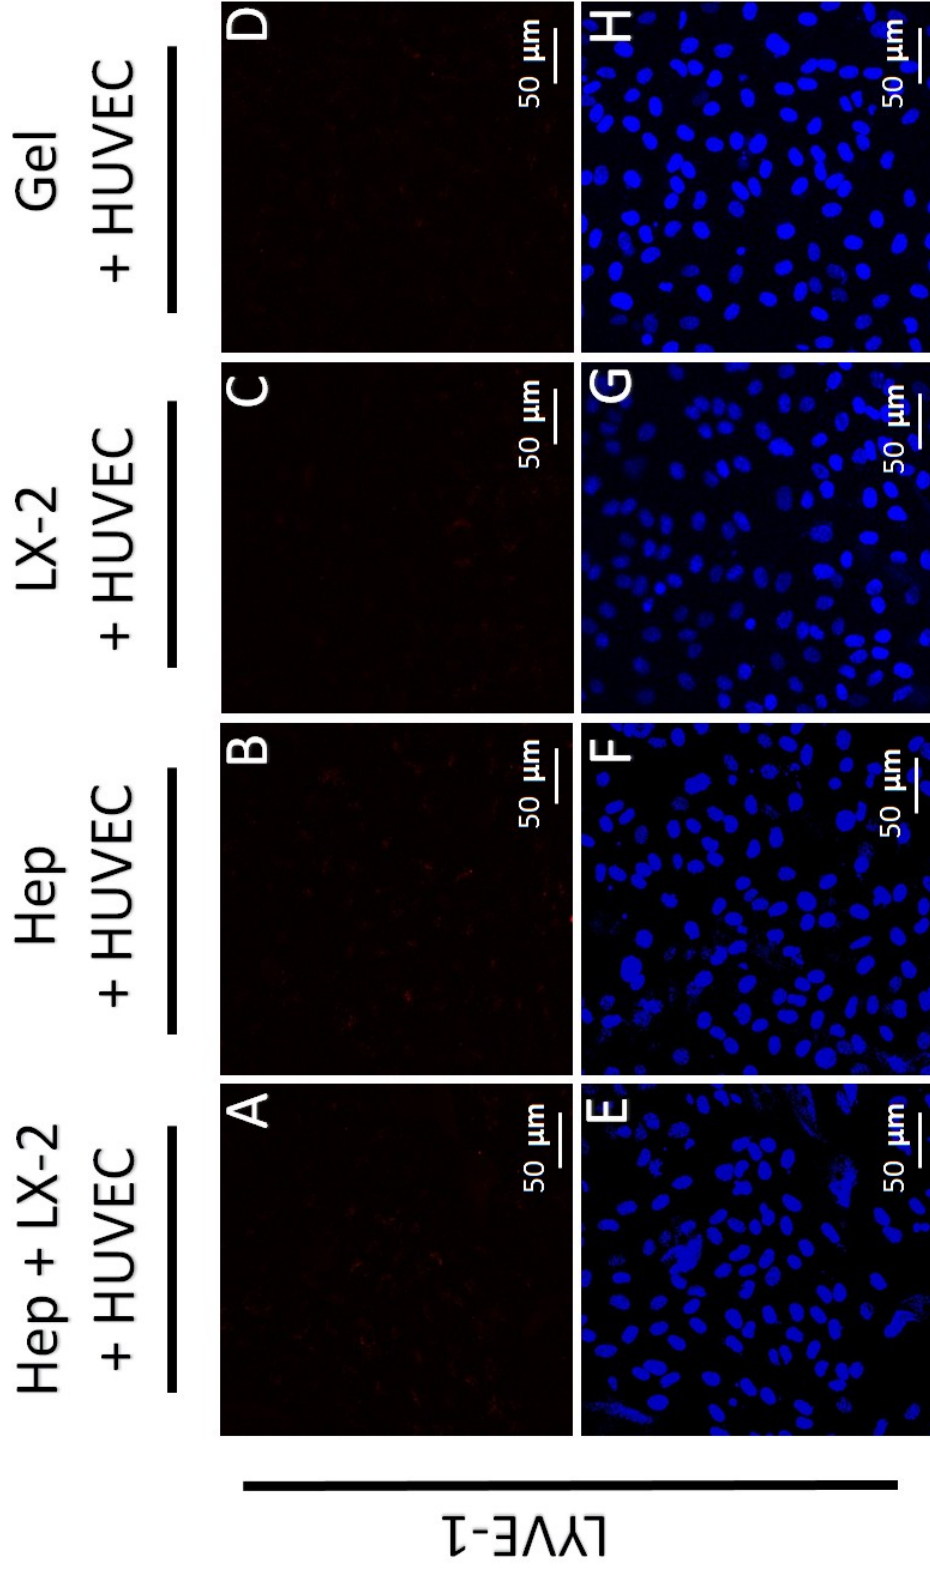

Fig. S1

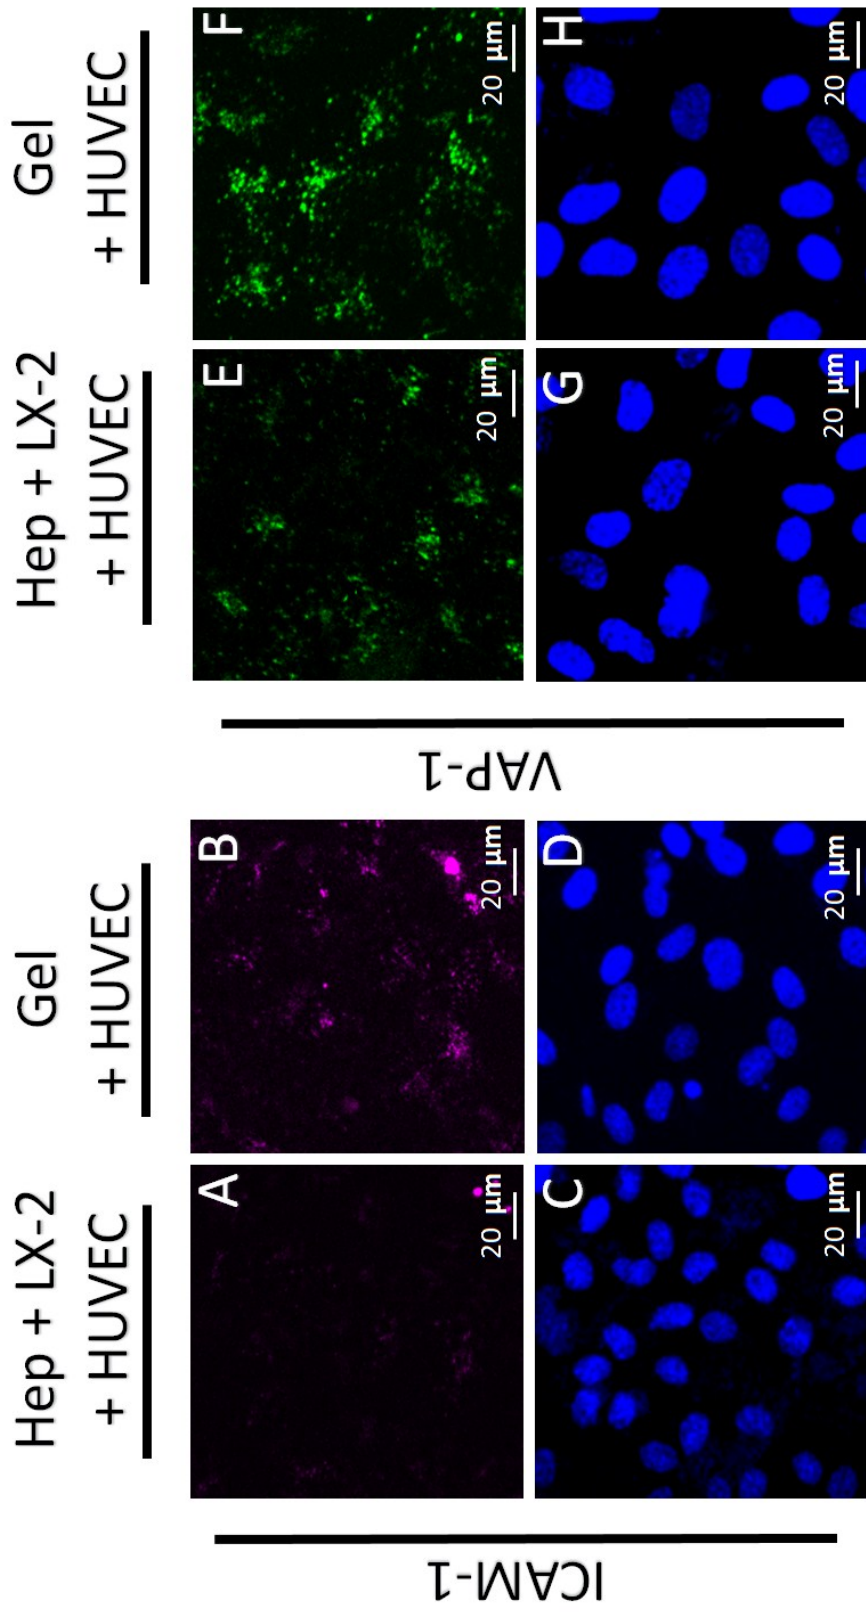

Fig. S2

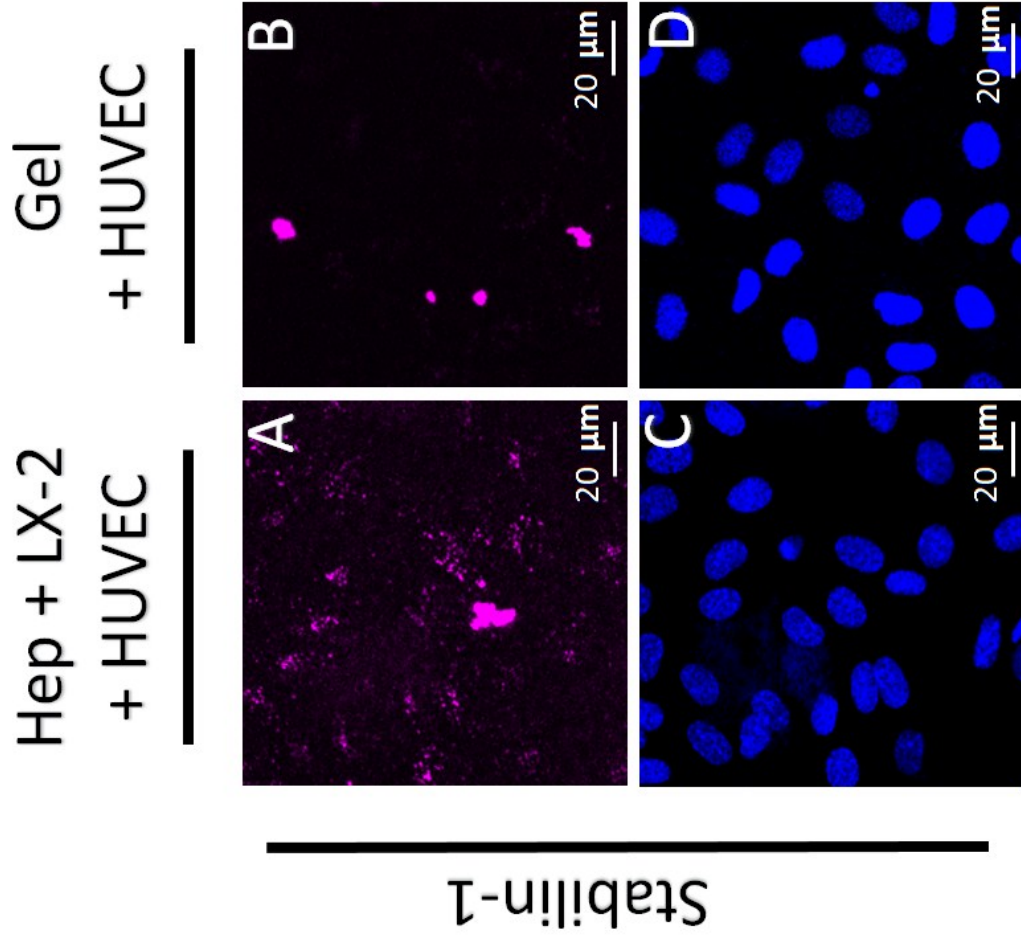

Fig. S3

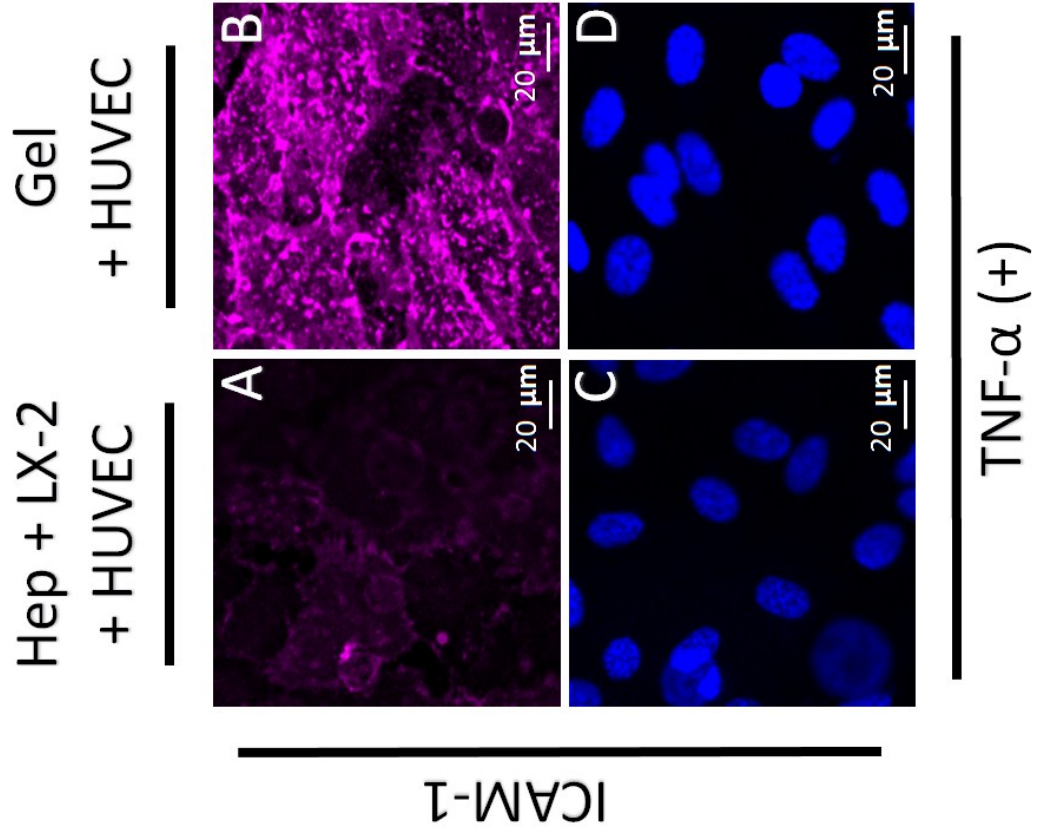

Fig. S4
